# Supplementary material for: Identification of novel genetic regulations associated with airway epithelial homeostasis using next-generation sequencing data and bioinformatics approaches
Source: PubMed Central journal article supplement (PMC5669919; doi:10.18632/oncotarget.19752), 2017-07-31
Supplement: oncotarget-08-82674-s001.pdf [file oncotarget-08-82674-s001.pdf]

Supplementary Table 1: Summary of mir-203a targeting *MEF2C*

| Prediction of mir-203a targeting sites on <i>MEF2C</i> |           |      |      |      |      |      |      |      |      |
|--------------------------------------------------------|-----------|------|------|------|------|------|------|------|------|
| miRmap                                                 | +         | +    | +    |      | +    | +    | +    | +    |      |
| TargetScan                                             | +         | +    |      | +    | +    | +    | +    |      | +    |
| miRDB                                                  | +         | +    |      |      | +    | +    | +    |      |      |
| Binding sites<br>(3'UTR)                               | 1331      | 1759 | 1912 | 2044 | 2277 | 2487 | 2509 | 3251 | 5693 |
|                                                        | I         | I    | I    | I    | I    | I    | I    | I    | I    |
|                                                        | 1337      | 1765 | 1917 | 2050 | 2283 | 2494 | 2515 | 3256 | 5699 |
| 3'UTR sequence conservation in species                 | Human     | +    | +    | +    | +    | +    | +    | +    | +    |
|                                                        | Chimp     | +    | +    | +    | +    | +    |      | +    | +    |
|                                                        | Rhesus    | +    | +    | +    | +    | +    |      | +    | +    |
|                                                        | Squirrel  | +    | +    | +    | +    | +    |      | +    | +    |
|                                                        | Mouse     | +    | +    | +    |      | +    |      |      | +    |
|                                                        | Rat       | +    | +    |      |      | +    |      | +    |      |
|                                                        | Rabbit    | +    | +    |      | +    | +    |      |      | +    |
|                                                        | Pig       | +    | +    | +    | +    | +    |      | +    | +    |
|                                                        | Cow       | +    | +    | +    | +    | +    |      | +    | +    |
|                                                        | Cat       | +    |      | +    | +    |      |      | +    | +    |
|                                                        | Dog       | +    | +    | +    | +    |      |      | +    | +    |
|                                                        | Brown bat | +    | +    | +    |      | +    |      | +    | +    |
|                                                        | Elephant  | +    |      |      |      | +    |      | +    | +    |
|                                                        | Opossum   |      |      |      |      |      |      | +    | +    |
|                                                        | Macaw     |      |      | +    |      |      |      |      | +    |
| Chicken                                                |           |      |      |      |      |      | +    | +    |      |
| Lizard                                                 |           |      |      |      |      |      |      |      |      |

“+” means the position identified in the databases and identical in species.

Supplementary Table 2: Summary of mir-3065-3p targeting *MDGAI*

| Prediction of mir-3065-3p targeting sites on <i>MDGAI</i> |           |      |      |      |      |      |
|-----------------------------------------------------------|-----------|------|------|------|------|------|
| miRmap                                                    | +         | +    | +    | +    | +    | +    |
| TargetScan                                                | +         |      | +    | +    | +    |      |
| miRDB                                                     | +         |      | +    | +    | +    |      |
| Binding sites                                             | 1515      | 2817 | 3133 | 3194 | 3265 | 4111 |
| (3'UTR)                                                   | I         | I    | I    | I    | I    | I    |
|                                                           | 1521      | 2822 | 3139 | 3200 | 3272 | 4116 |
| 3'UTR sequence conservation in species                    | Human     | +    | +    | +    | +    | +    |
|                                                           | Chimp     |      | +    |      |      | +    |
|                                                           | Rhesus    |      | +    |      |      | +    |
|                                                           | Squirrel  |      |      |      |      | +    |
|                                                           | Mouse     | +    |      |      |      |      |
|                                                           | Rat       |      |      |      |      |      |
|                                                           | Rabbit    |      |      |      |      |      |
|                                                           | Pig       |      |      |      |      | +    |
|                                                           | Cow       |      |      |      |      | +    |
|                                                           | Cat       |      |      |      |      | +    |
|                                                           | Dog       |      |      |      |      | +    |
|                                                           | Brown bat |      |      |      |      |      |
|                                                           | Elephant  |      |      |      |      | +    |
|                                                           | Opossum   |      |      |      |      |      |
|                                                           | Macaw     |      |      |      |      |      |
| Chicken                                                   |           |      |      |      |      |      |
| Lizard                                                    |           |      |      |      |      |      |

“+” means the position identified in the databases and identical in species.
